# Supplementary material for: mRNAs containing NMD-competent premature termination codons are stabilized and translated under UPF1 depletion
Source: PubMed Central journal article supplement (PMC5696521; doi:10.1038/s41598-017-16177-9), 2017-11-20

# **mRNAs containing NMD-competent premature termination codons are stabilized and translated under UFP1 depletion**

Won Kyu Kim<sup>1</sup>, SeongJu Yun<sup>1</sup>, Yujin Kwon<sup>1</sup>, Kwon Tae You<sup>2</sup>, Nara Shin<sup>3</sup>, Jiyeon Kim<sup>4</sup>, and Hoguen Kim<sup>1\*</sup>

1. Department of Pathology and Brain Korea 21 PLUS Projects for Medical Science, Yonsei University College of Medicine, Seoul 03722, Republic of Korea

2. Broad Institute of MIT and Harvard, Cambridge, MA 02142, USA

3. Department of Genetics, Harvard Medical School, 77 Avenue Louis Pasteur, Boston, MA 02115, USA

4. Department of Pharmacology and Brain Korea 21 Project for Medical Sciences, Yonsei University College of Medicine, Seoul 03722, Republic of Korea

## **\*Correspondence:**

Hoguen Kim, M.D., Ph.D.

Professor of Pathology

Yonsei University College of Medicine

Seoul 120-752, Korea

Tel: +82 2 2228 1761/ Fax: +82 2 363 5263/ e-mail: [hkyonse@yuhs.ac](mailto:hkyonse@yuhs.ac)

## Supplementary Information

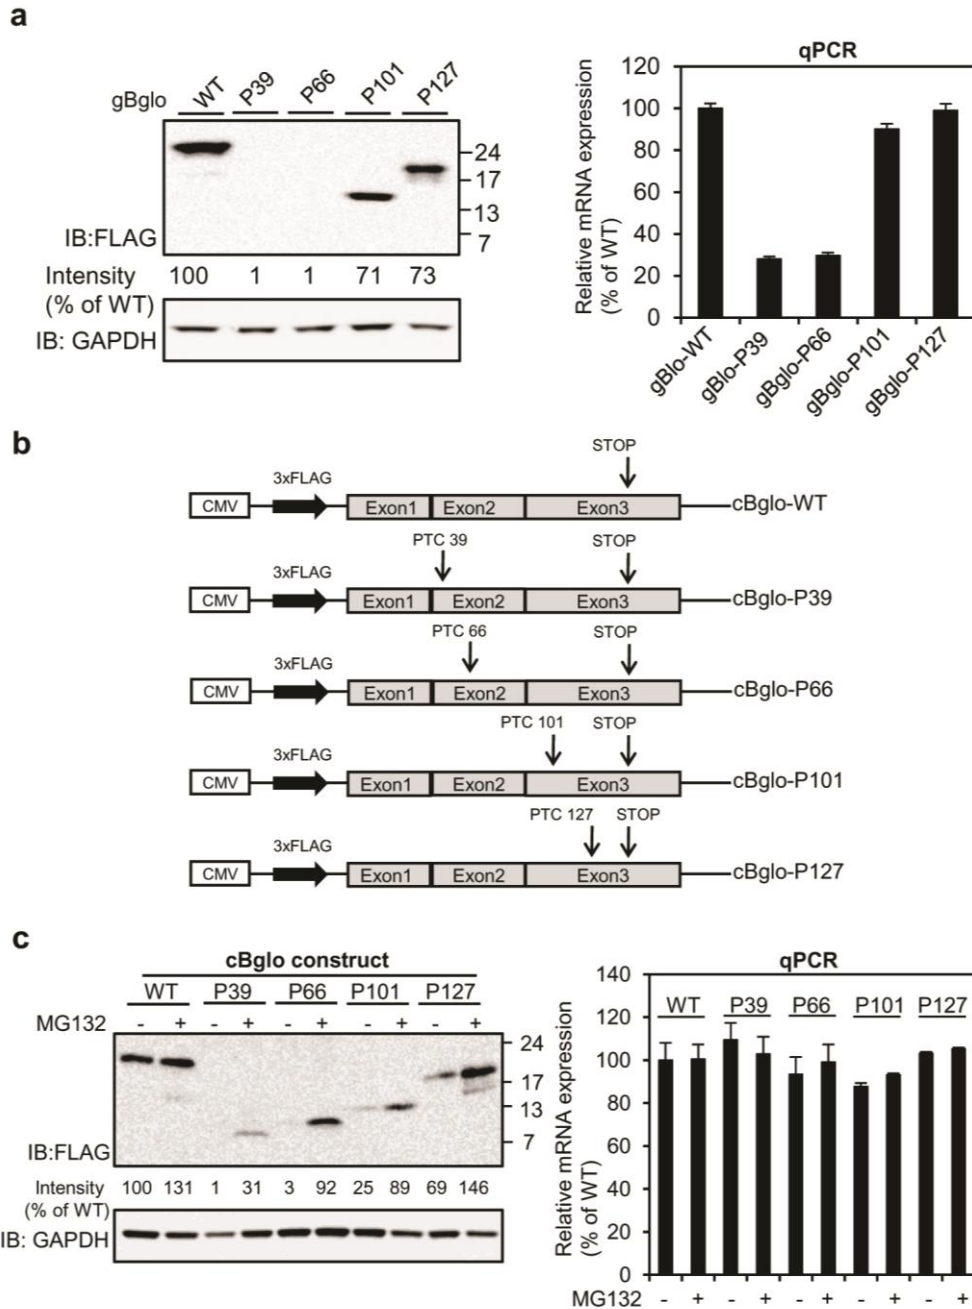

**Supplementary Figure S1.** The genomic human  $\beta$ -globin expression construct gBгло-P66 is a suitable model to evaluate generation of mutant proteins from NMD-resistant PTC-containing mRNAs. **(a)** Western analysis of protein expression using anti-FLAG antibody (left) and qPCR analysis of mRNA expression (right) in HeLa cells transfected with the indicated genomic  $\beta$ -globin constructs. IB, immunoblot. Band density relative to wild-type is expressed numerically below each lane of blot. GAPDH served as internal control. **(b)** Schematic diagram of expression vector containing wild-type human  $\beta$ -globin cDNA (cBгло-WT) and plasmids derived from cBгло-WT by mutagenesis to introduce premature termination codons (PTCs) at the indicated positions. **(c)** (Left) Western analysis of wild-

type and mutant protein expression from the indicated  $\beta$ -globin cDNA constructs in HeLa cells in the presence and absence of proteasome inhibitor MG132. Arrow indicates the expected position of mutant protein. IB, immunoblot. Band density relative to wild-type is expressed numerically below each lane. GAPDH served as internal control. (Right) qPCR analysis of mRNA expressed from the indicated  $\beta$ -globin cDNA constructs in the presence and absence of MG132.

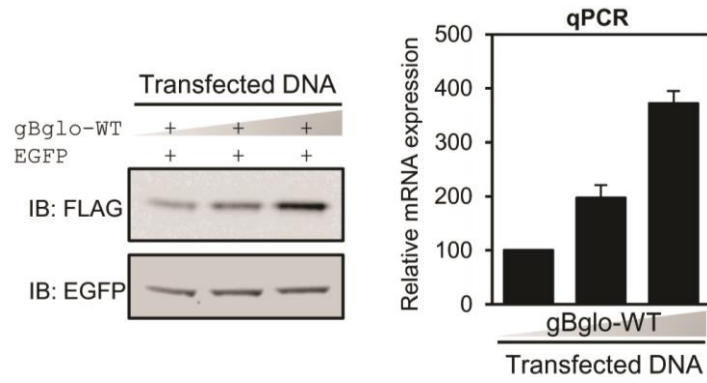

**Supplementary Figure S2.** Overexpression of gBгло-WT induces accumulation of both  $\beta$ -globin mRNA and protein. HeLa cells were transfected with increasing amounts of gBгло-WT. Western analysis of protein expression (left) and qPCR analysis of mRNA expression level (right) in HeLa cells.

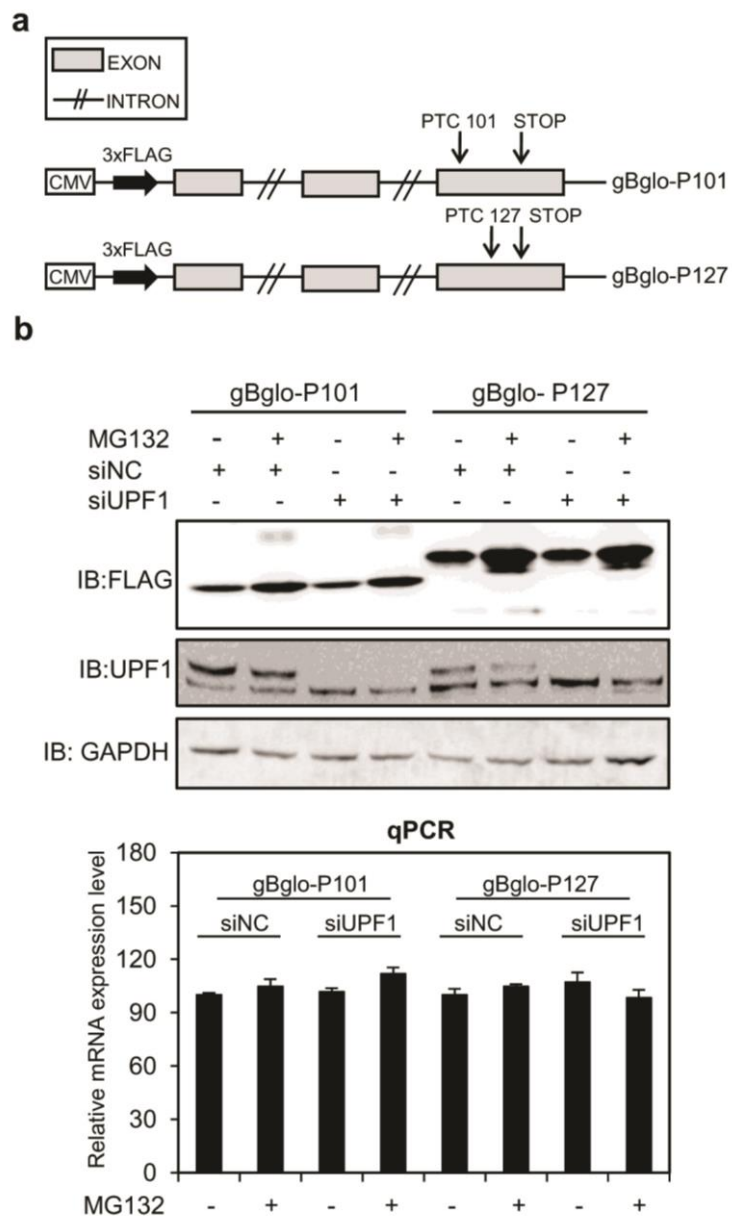

**Supplementary Figure S3.** Expression of protein from  $\beta$ -globin constructs generating mutant NMD-irrelevant mRNAs was minimally affected by UPF1 knockdown. **(a)** Schematic diagram of expression vectors containing wild-type human genomic  $\beta$ -globin DNA mutagenized to introduce premature termination codons (PTCs) at the indicated positions, generating NMD (nonsense-mediated decay)-irrelevant mRNAs. **(b)** Western analysis (upper) and qPCR analysis of mRNA level (lower) of HeLa cells transfected with constructs shown in (A) in the presence or absence of siRNA targeting UPF1 (siUPF1) or control siRNA (siNC), and in the presence and absence of MG132.

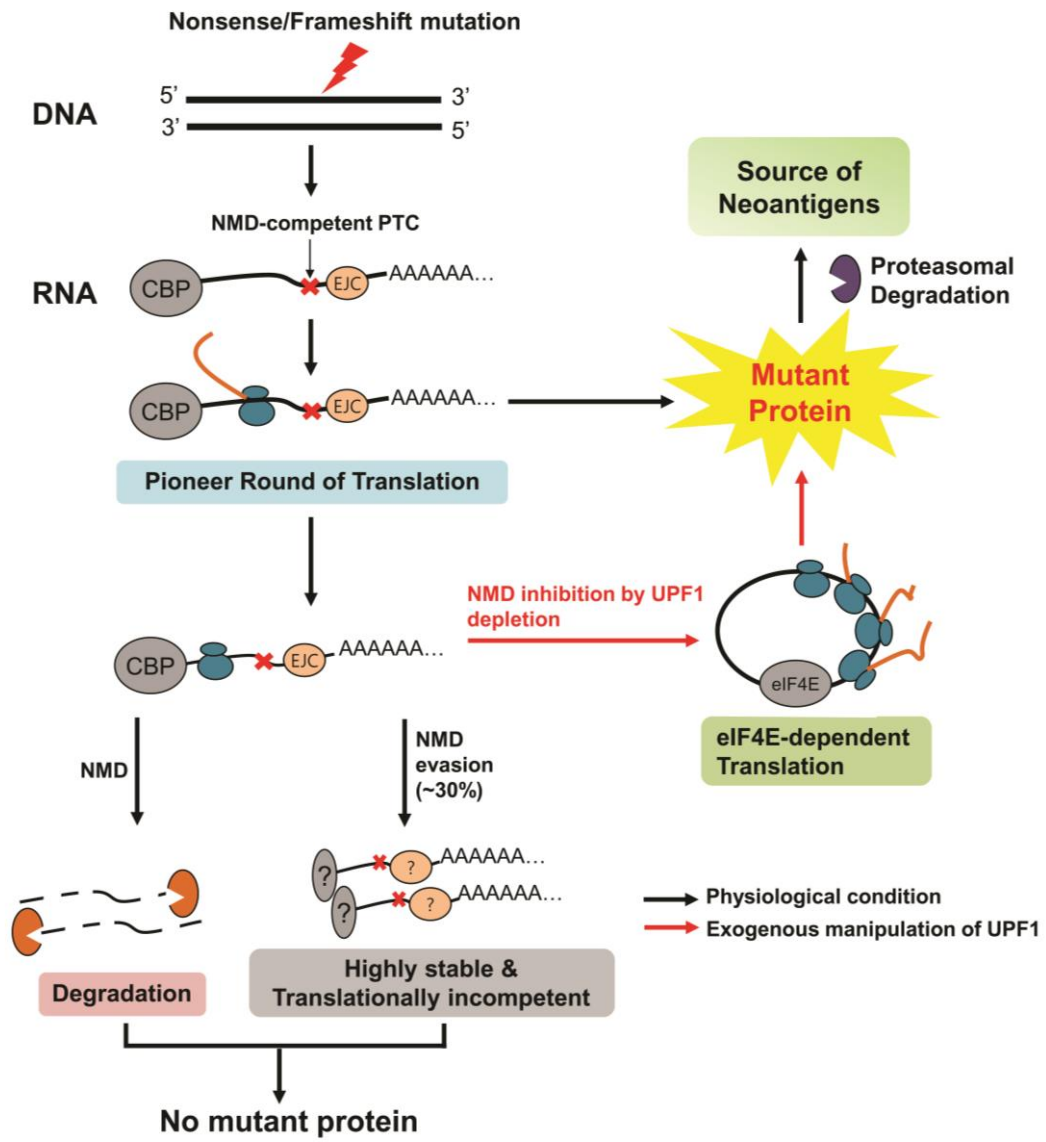

**Supplementary Figure S4.** Schematic model for generation of mutant proteins from PTC-containing mRNAs. Model shows the differential fates of PTC-containing mRNAs.

**Supplementary table S1. Primers used for cloning and targeted nucleotide sequences of siRNAs**

| <b>Gene</b>                        | <b>Direction</b>                  | <b>Sequence</b>           |
|------------------------------------|-----------------------------------|---------------------------|
| PCMV10 3XFLAG-β-globin (gDNA form) | Forward                           | 5'- AGCAACCTCAAACAGACACC  |
|                                    | Reverse                           | 5'- GACCTCCCACATTCCCTTTT  |
| PCMV10 3XFLAG-β-globin (cDNA form) | Forward                           | 5'- TGCAACCTCAAACAGACACCA |
|                                    | Reverse                           | 5'- GCAAGAAAGCGAGCTTAGTGA |
| PCMV-HA-4E-BP1                     | Forward                           | 5'- GTGCAGCGCACAGGAGAC    |
|                                    | Reverse                           | 5'- CTCCACACGATGGCTGGT    |
| PCMV-HA-eIF4E                      | Forward                           | 5'- CTAAGATGGCGACTGTCGAA  |
|                                    | Reverse                           | 5'- ATTGCTTGACGCAGTCTCCT  |
| <b>siRNA</b>                       | <b>Sequence</b>                   |                           |
| siUPF1                             | 5'- GAUGCAGUUCGCUCCAUU d(TT)-3'   |                           |
| siEIF4A3                           | 5'- GAGCAAUCAAGCAGAUCAU d(TT)-3'  |                           |
| siY14                              | 5'- CGCUCUGUUGAAGGCUGGA d(TT)-3'  |                           |
| siSMG1                             | 5'- GTGTATGTGCGCCAAAGTA d(TT)-3'  |                           |
| siUPF2                             | 5'- CAACAGCCCUUCCAGAAUC d(TT)-3'  |                           |
| siMAGOH                            | 5'- AAAGCGUGAUGGAGGAACUG d(TT)-3' |                           |

# Supplementary Information (Blots)

## RT-PCR results

Main Figure 1B -β-globin

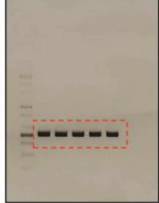

Main Figure 1B -EGFP

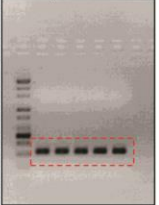

Main Figure 2F -FLAG Short exposure

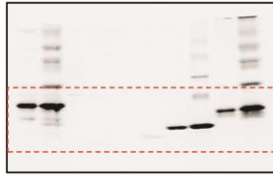

Main Figure 2F -FLAG long exposure

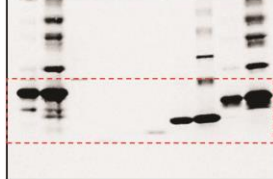

Main Figure 2F -EGFP

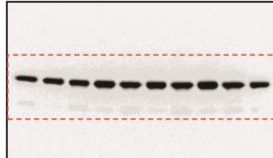

Main Figure 2F -HIG1α

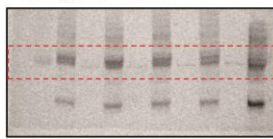

Main Figure 3B -FLAG Short exposure

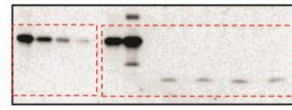

Main Figure 3B -FLAG Long exposure

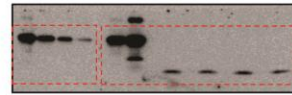

Main Figure 3B -EGFP

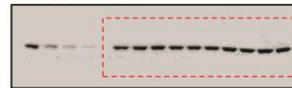

Main Figure 3D -FLAG Main Figure 3D -EGFP

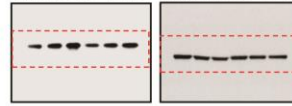

gBgl0-WT Main Figure 3D -FLAG Main Figure 3D -EGFP

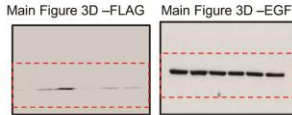

gBgl0-P66

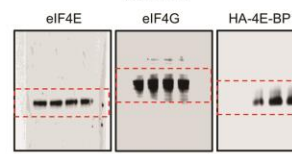

Main Figure 3H -Input

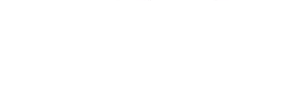

eIF4E eIF4G

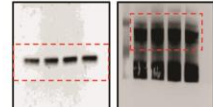

Main Figure 3H -Input eIF4E eIF4G

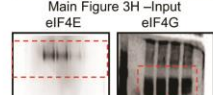

Main Figure 3H -IP eIF4E eIF4G

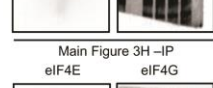

Main Figure 3H -IP

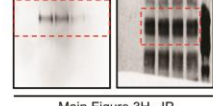

eIF4E eIF4G HA-4E-BP1

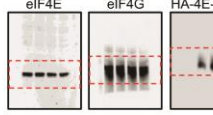

Main Figure 3I -Input

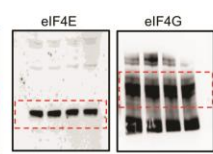

Main Figure 3H -Input

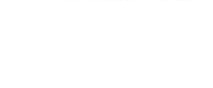



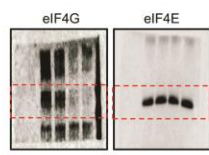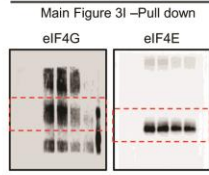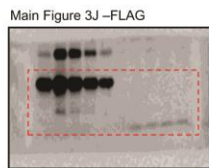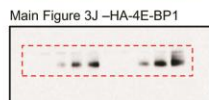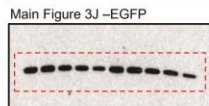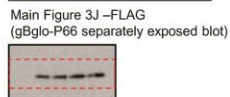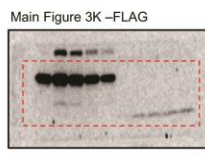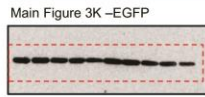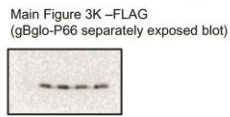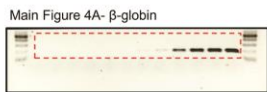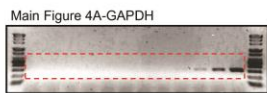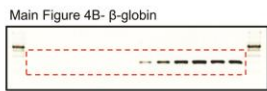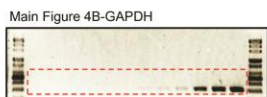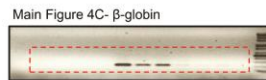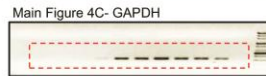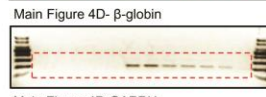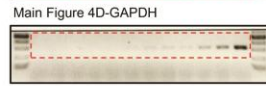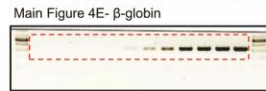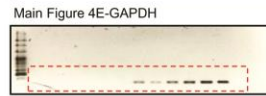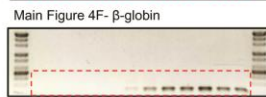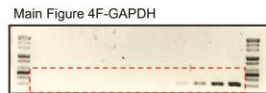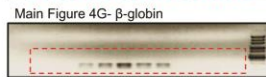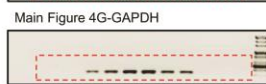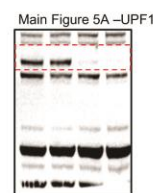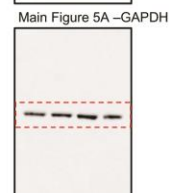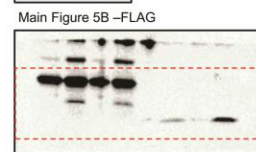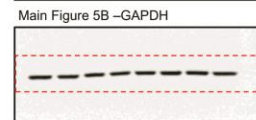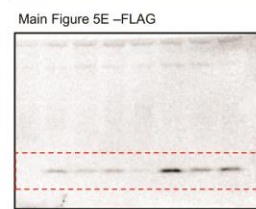

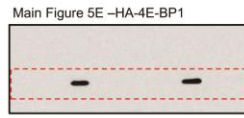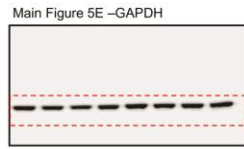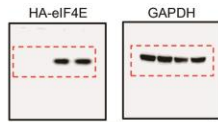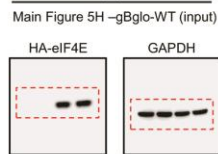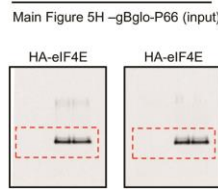

Main Figure 5H –IP (HA)

**RT-PCR results**

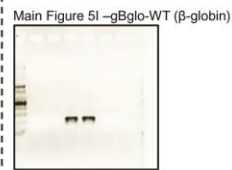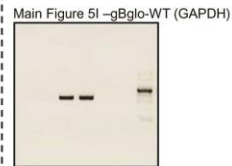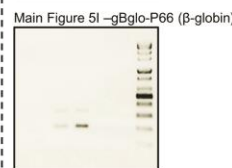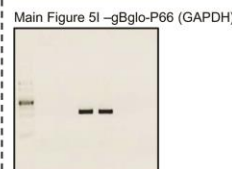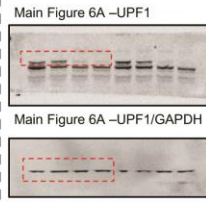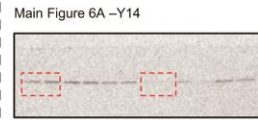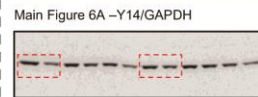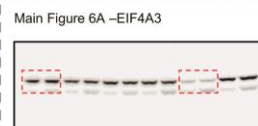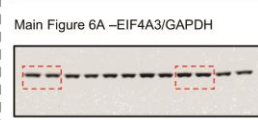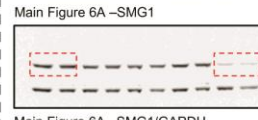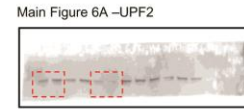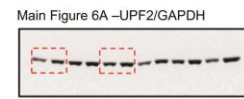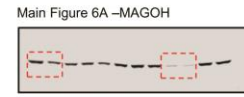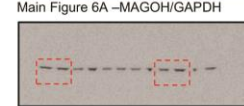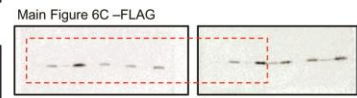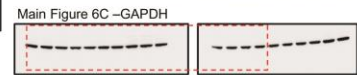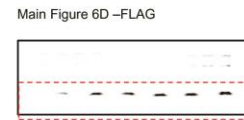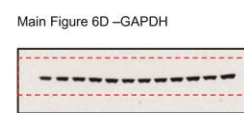

Supplement: 41598_2017_16177_MOESM1_ESM.pdf [file 41598_2017_16177_MOESM1_ESM.pdf]
